# Supplementary material for: China’s urban expansion from 1990 to 2010 determined with satellite remote sensing
Source: Springer Nature journal article supplement (doi:10.1007/s11434-012-5235-7), 2012-06-07
Supplement: 11434_2012_5235_MOESM1_ESM.pdf [file 11434_2012_5235_MOESM1_ESM.pdf]

- 404–410
- 10 Guneralp B, Seto K C. Environmental impacts of urban growth from an integrated dynamic perspective: A case study of Shenzhen, South China. *Global Environ Chang*, 2008, 18: 720–735
  - 11 Liang L, Xu B, Chen Y L, et al. Combining spatial-temporal and phylogenetic analysis approaches for improved understanding on global H5N1 transmission. *PLoS One*, 2010, 5: e13575
  - 12 Gong P, Liang S, Carlton E, et al. Urbanization and health in China. *Lancet*, 2012, 379: 843–852
  - 13 Chen J, Gong P, He C, et al. Assessment of urban development plan of Beijing by using CA-based urban growth model. *Photogramm Eng Remote Sens*, 2002, 68: 1063–1071
  - 14 Batty M. The size, scale, and shape of cities. *Science*, 2008, 319: 769–771
  - 15 Pham H M, Yamaguchi Y. Urban growth and change analysis using remote sensing and spatial metrics from 1975 to 2003 for Hanoi, Vietnam. *Int J Remote Sens*, 2011, 32: 1901–1915
  - 16 Ferreira J A, Condessa B, Almeida J C, et al. Urban settlement delimitation in low-density areas — An application to the municipality of Tomar (Portugal). *Landscape Urban Plan*, 2010, 97: 156–167
  - 17 Griffiths P, Hostert P, Gruebner O, et al. Mapping megacity growth with multi-sensor data. *Remote Sens Environ*, 2010, 114: 426–439
  - 18 Gong P, Howarth P J. Land-use classification of SPOT HRV data using a cover-frequency method. *Int J Remote Sens*, 1992, 13: 1459–1471
  - 19 Gong P, Marceau D, Howarth P J. A comparison of spatial feature extraction algorithms for land-use mapping with SPOT HRV data. *Remote Sens Environ*, 1992, 40: 137–151
  - 20 Gong P, Howarth P J. The use of structural information for improving land-cover classification accuracies at the rural-urban fringe. *Photogramm Eng Remote Sens*, 1990, 56: 67–73
  - 21 Wang L, Gong P, Ying Q, et al. Settlement extraction over North China Plain with Landsat and Beijing-1 data using an improved watershed segmentation algorithm. *Int J Remote Sens*, 2010, 31: 1411–1426
  - 22 Xu B, Gong P. Land use/cover classification with multispectral and hyperspectral EO-1 data. *Photogramm Eng Remote Sens*, 2007, 73: 955–965
  - 23 Yin J, Yin Z, Zhong H D, et al. Monitoring urban expansion and land use/land cover changes of Shanghai metropolitan area during the transitional economy (1979–2009) in China. *Environ Monit Assess*, 2011, 177: 609–621
  - 24 Dai X Y, Guo Z Y, Zhang L Q, et al. Spatiotemporal pattern of urban land cover evolution with urban renewal and expansion in Shanghai based on mixed pixel classification for remote sensing imagery. *Int J Remote Sens*, 2010, 31: 6095–6114
  - 25 Catalan B, Sauri D, Serra P. Urban sprawl in the Mediterranean? Patterns of growth and change in the Barcelona metropolitan region 1993–2000. *Landscape Urban Plan*, 2008, 85: 174–184
  - 26 Guo L Y, Wang D L, Qiu J J, et al. Spatiotemporal patterns of land use change along the Bohai Rim in China during 1985–2005. *J Geogr Sci*, 2009, 19: 568–576
  - 27 Lü Z Q, Wu Z F, Wei J B, et al. Monitoring of the urban sprawl using geoprocessing tools in the Shenzhen municipality, China. *Environ Earth Sci*, 2011, 62: 1131–1141
  - 28 Seto K C, Kaufmann R C. Modeling the drivers of urban land use change in the Pearl River Delta, China: Integrating remote sensing with socio-economic data. *Land Econom*, 2003, 79: 106–121
  - 29 Tian G J, Jiang J, Yang Z F, et al. The urban growth, size distribution and spatio-temporal dynamic pattern of the Yangtze River Delta metropolitan region, China. *Ecol Model*, 2011, 222: 865–878
  - 30 Wei Y P, Zhao M. Urban spill over vs local urban sprawl: Entangling land-use regulations in the urban growth of China's megacities. *Land Use Policy*, 2009, 26: 1031–1045
  - 31 Xu C, Liu M S, Yang X J, et al. Detecting the spatial differentiation in settlement change rates during rapid urbanization in the Nanjing Metropolitan region, China. *Environ Monit Assess*, 2010, 158: 471–478
  - 32 Yang J, Zhao L S, McBride J, et al. Can you see green? Assessing the visibility of urban forests. *Landscape Urban Plan*, 2009, 91: 97–104
  - 33 Yu W H, Zang S Y, Wu C S, et al. Analyzing and modeling land use land cover change in the Daqing City, China. *Appl Geogr*, 2011, 31: 600–608
  - 34 Fan F L, Wang Y P, Qiu M H, et al. Evaluating the temporal and spatial expansion of Guangzhou from 1979 to 2003 by remote sensing and GIS methods. *Int J Geogr Inf Sci*, 2009, 23: 1371–1388
  - 35 Fernandez J E. Resource consumption of new urban construction in China. *J Ind Ecol*, 2007, 11: 99–115
  - 36 Nation Bureau of Statistics, PRC. China's main demographic indicators from the 3rd national population census, 1982
  - 37 Nation Bureau of Statistics, PRC. China's main demographic indicators from the 6th national population census, 2011
  - 38 Liu J Y, Liu M L, Tian H Q, et al. Spatial and temporal patterns of China's cropland during 1990–2000: An analysis based on Landsat TM data. *Remote Sens Environ*, 2005, 98: 442–456
  - 39 Zhou S Y, Zhu A X, Qiu W L, et al. GIS based connectivity analysis and its application in prime farmland protection planning (in Chinese). *Trans Chin Soc Agr Eng*, 2008, 24: 72–77
  - 40 Gong P, Howarth P J. Frequency-based contextual classification and grey-level vector reduction for land-use identification. *Photogramm Eng Remote Sens*, 1992, 58: 423–437
  - 41 Urban Social and Economic Investigation Division, National Bureau of Statistics of China. *China City Statistical Yearbook* (in Chinese). Beijing: China Statistics Press, 2010
  - 42 Global Map Press. *Provincial Atlas of China — Taiwan Province* (in Chinese). Beijing: Global Map Press, 2008
  - 43 Schneider A, Friedl M A, Potore D. Mapping global urban areas using MODIS 500-m data: New methods and datasets based on 'urban ecoregions'. *Remote Sens Environ*, 2010, 114: 1733–1746
  - 44 Yang, L, Huang C, Homer B K, et al. An approach for mapping large-area impervious surfaces: Synergistic use of Landsat-7 ETM+ and high spatial resolution imagery. *Can J Remote Sens*, 2003, 29: 230–240
  - 45 Li C, Wang L, Gong P, et al. Residential areas extraction method over large areas integrating supervised/unsupervised/contextual/object-based methods and auxiliary data with medium resolution remotely sensed data. *Joint Urban Remote Sensing Event—Munich*. 2011. 173–176
  - 46 Gong P. China needs no foreign help to feed itself. *Nature*, 2011, 474: 7

**Open Access** This article is distributed under the terms of the Creative Commons Attribution License which permits any use, distribution, and reproduction in any medium, provided the original author(s) and source are credited.

## Supporting Information

**Table S1** Urban areas, populations and GDP of the 147 large cities in China whose populations are greater than 500000

The supporting information is available online at [csb.scichina.com](http://csb.scichina.com) and [www.springerlink.com](http://www.springerlink.com). The supporting materials are published as submitted, without typesetting or editing. The responsibility for scientific accuracy and content remains entirely with the authors.

**Table S1** Urban areas, populations and GDP of the 147 large cities in China whose populations are greater than 500000 (Area measurement unit: km<sup>2</sup>, Population measurement unit: 10000 persons, GDP measurement unit: 100000000 Yuan)

| City         | 2010                   |             |          | 2000                   |            |         | 1990                   |            |        |
|--------------|------------------------|-------------|----------|------------------------|------------|---------|------------------------|------------|--------|
|              | Area of built district | Population* | GDP*     | Area of built district | Population | GDP     | Area of built district | Population | GDP    |
| Shanghai     | 1514.52                | 1921.32     | 14875.80 | 857.94                 | 928.21     | 4098.64 | 422.45                 | 749.65     | 511.74 |
| Beijing      | 2416.48                | 1491.80     | 11972.00 | 1516.22                | 635.38     | 2332.31 | 1106.12                | 576.96     | 438.48 |
| Shenzhen     | 692.48                 | 891.23      | 8201.32  | 401.95                 | 300.00     | 1665.24 | 61.58                  | 35.07      | 107.20 |
| Chongqing    | 269.39                 | 800.11      | 4891.58  | 141.09                 | 460.77     | 786.20  | 103.10                 | 259.75     | 103.82 |
| Guangzhou    | 637.05                 | 654.68      | 8409.75  | 328.08                 | 401.80     | 2125.11 | 113.18                 | 291.43     | 261.53 |
| Tianjin      | 779.60                 | 580.40      | 7030.25  | 391.07                 | 481.57     | 1392.88 | 264.10                 | 457.47     | 245.57 |
| Wuhan        | 440.36                 | 541.01      | 3888.85  | 275.11                 | 369.34     | 1206.84 | 141.21                 | 328.42     | 118.36 |
| Nanjing      | 608.07                 | 482.60      | 3825.76  | 230.25                 | 255.86     | 775.59  | 97.58                  | 209.02     | 125.43 |
| Shenyang     | 530.72                 | 423.42      | 3667.22  | 344.26                 | 353.53     | 937.88  | 228.29                 | 360.37     | 184.25 |
| Chengdu      | 498.07                 | 410.93      | 3139.86  | 228.38                 | 227.68     | 669.86  | 113.06                 | 171.33     | 99.19  |
| Harbin       | 275.59                 | 398.60      | 2272.26  | 203.84                 | 278.03     | 617.35  | 131.86                 | 244.34     | 104.53 |
| Xi'an        | 381.64                 | 341.80      | 2315.06  | 190.79                 | 246.60     | 601.53  | 120.74                 | 195.90     | 76.72  |
| Zhengzhou    | 293.11                 | 285.01      | 1431.79  | 151.71                 | 152.98     | 343.47  | 83.45                  | 115.97     | 50.08  |
| Jinan        | 276.54                 | 281.00      | 2512.63  | 180.28                 | 168.85     | 661.41  | 122.05                 | 145.92     | 91.73  |
| Qingdao      | 241.92                 | 275.44      | 2788.77  | 151.39                 | 167.43     | 628.92  | 83.79                  | 145.92     | 85.37  |
| Taiyuan      | 279.63                 | 271.29      | 1422.45  | 177.54                 | 185.12     | 294.82  | 139.32                 | 153.39     | 73.42  |
| Dalian       | 332.97                 | 269.88      | 3020.45  | 244.26                 | 207.69     | 790.10  | 139.97                 | 172.33     | 132.43 |
| Hangzhou     | 347.63                 | 265.12      | 4069.87  | 137.06                 | 143.69     | 677.85  | 71.82                  | 126.26     | 113.96 |
| Changchun    | 313.13                 | 257.45      | 2053.38  | 203.40                 | 217.01     | 618.16  | 138.02                 | 167.93     | 58.77  |
| Urumchi      | 297.78                 | 241.20      | 1079.44  | 189.18                 | 133.76     | 257.53  | 131.87                 | 104.69     | 57.37  |
| Changsha     | 300.04                 | 239.17      | 2250.14  | 113.46                 | 139.00     | 415.25  | 65.62                  | 111.32     | 51.49  |
| Shantou      | 70.81                  | 226.65      | 1027.85  | 51.54                  | 89.49      | 223.46  | 24.92                  | 57.86      | 29.16  |
| Shijiazhuang | 240.75                 | 224.50      | 1082.13  | 183.51                 | 141.00     | 417.73  | 107.96                 | 106.84     | 52.97  |
| Kunming      | 247.36                 | 221.12      | 1348.49  | 145.19                 | 150.27     | 483.31  | 85.88                  | 119.53     | 73.06  |
| Nanchang     | 121.74                 | 204.00      | 1246.47  | 80.30                  | 133.94     | 309.39  | 47.86                  | 108.61     | 37.97  |
| Suzhou       | 494.03                 | 202.31      | 2992.33  | 137.81                 | 89.18      | 335.42  | 52.94                  | 70.65      | 47.08  |
| Wuxi         | 496.70                 | 201.57      | 2740.61  | 167.65                 | 99.27      | 426.43  | 73.57                  | 82.68      | 59.70  |
| Hefei        | 348.03                 | 195.53      | 1591.47  | 95.20                  | 107.50     | 235.22  | 62.50                  | 73.33      | 35.64  |
| Tangshan     | 127.49                 | 193.13      | 1919.37  | 93.13                  | 114.00     | 295.74  | 76.53                  | 104.42     | 50.54  |
| Lanzhou      | 131.31                 | 187.99      | 804.88   | 104.48                 | 148.08     | 270.64  | 90.80                  | 119.46     | 63.38  |
| Dongguan     | 1200.18                | 179.10      | 3763.91  | 600.56                 | 16.07      | 489.73  | 152.55                 | 30.87      | 64.61  |
| Guiyang      | 114.49                 | 178.88      | 725.95   | 82.02                  | 130.50     | 215.67  | 44.56                  | 101.86     | 44.52  |
| Luoyang      | 164.65                 | 165.48      | 666.37   | 89.23                  | 103.82     | 199.06  | 45.27                  | 75.98      | 37.54  |
| Nanning      | 137.32                 | 165.14      | 1104.28  | 82.75                  | 98.74      | 215.22  | 43.44                  | 72.19      | 34.76  |
| Fuzhou       | 198.19                 | 160.13      | 1327.98  | 102.27                 | 111.58     | 464.10  | 57.76                  | 87.48      | 47.97  |
| Baotou       | 221.16                 | 149.91      | 1806.31  | 130.00                 | 111.35     | 189.33  | 80.81                  | 98.35      | 34.99  |
| Zibo         | 317.34                 | 147.66      | 1887.83  | 174.99                 | 119.78     | 522.62  | 57.42                  | 113.81     | 87.74  |
| Handan       | 97.21                  | 147.39      | 483.61   | 68.94                  | 104.85     | 169.44  | 50.55                  | 83.75      | 39.15  |
| Anshan       | 188.69                 | 147.24      | 1077.95  | 129.00                 | 129.10     | 329.03  | 82.90                  | 120.40     | 73.88  |
| Linyi        | 351.64                 | 143.49      | 768.93   | 198.87                 | 42.16      | 185.81  | 48.25                  | 32.47      | 25.91  |
| Ningbo       | 338.54                 | 142.60      | 2549.00  | 81.99                  | 70.30      | 436.06  | 18.76                  | 55.25      | 52.69  |
| Xiamen       | 278.81                 | 142.00      | 1737.23  | 84.83                  | 66.22      | 501.87  | 31.98                  | 38.68      | 43.37  |

|              |        |        |         |        |        |        |       |        |        |
|--------------|--------|--------|---------|--------|--------|--------|-------|--------|--------|
| Yantai       | 185.17 | 137.79 | 1553.01 | 110.17 | 82.10  | 296.48 | 56.98 | 45.21  | 28.83  |
| Xuzhou       | 178.60 | 137.67 | 1143.36 | 86.24  | 91.85  | 288.10 | 40.88 | 80.57  | 36.79  |
| Fushun       | 103.60 | 130.38 | 517.40  | 78.82  | 127.55 | 170.32 | 61.48 | 120.24 | 52.99  |
| Foshan       | 175.04 | 129.19 | 4820.90 | 90.29  | 42.44  | 159.48 | 32.75 | 30.32  | 34.63  |
| Jilin        | 101.65 | 127.32 | 831.64  | 83.46  | 124.36 | 238.69 | 60.26 | 103.69 | 52.14  |
| Changzhou    | 461.79 | 119.84 | 1919.42 | 133.37 | 81.25  | 253.62 | 66.66 | 53.15  | 39.53  |
| Datong       | 114.58 | 119.20 | 213.63  | 79.37  | 97.40  | 137.28 | 60.62 | 79.83  | 39.58  |
| Weifang      | 243.33 | 116.64 | 689.95  | 118.06 | 59.03  | 183.33 | 37.49 | 42.85  | 31.80  |
| Huaian       | 108.36 | 110.00 | 685.61  | 42.40  | 12.48  | 69.76  | 25.96 | 13.11  | 24.76  |
| Qiqihar      | 83.65  | 108.59 | 341.29  | 61.42  | 112.38 | 121.35 | 51.20 | 107.01 | 31.74  |
| Baoding      | 105.91 | 106.24 | 480.88  | 86.27  | 61.09  | 136.41 | 43.95 | 48.32  | 24.36  |
| Wenzhou      | 99.55  | 105.96 | 1054.35 | 60.18  | 53.12  | 332.05 | 23.67 | 40.19  | 20.59  |
| Daqing       | 89.96  | 105.71 | 1928.99 | 48.91  | 84.04  | 987.61 | 30.02 | 65.73  | 150.06 |
| Huainan      | 57.40  | 104.17 | 362.54  | 33.03  | 84.20  | 98.47  | 27.86 | 70.39  | 22.25  |
| Huhehot      | 207.46 | 102.81 | 1181.34 | 97.23  | 79.00  | 124.50 | 57.88 | 65.25  | 23.92  |
| Wuhu         | 90.36  | 102.08 | 652.34  | 32.32  | 51.43  | 110.42 | 23.95 | 42.57  | 17.95  |
| Nanyang      | 64.46  | 101.34 | 383.36  | 42.04  | 50.96  | 128.22 | 25.54 | 24.33  | 10.47  |
| Liuzhou      | 110.85 | 97.35  | 708.83  | 82.94  | 79.25  | 143.01 | 56.47 | 60.93  | 32.78  |
| Taizhou      | 34.19  | 95.45  | 729.35  | 17.12  | 27.31  | 256.61 | 6.53  | 17.98  | 23.82  |
| Shangqiu     | 70.50  | 95.00  | 204.02  | 39.91  | 35.00  | 72.24  | 10.78 | 16.50  | 4.30   |
| Huizhou      | 47.10  | 94.21  | 888.26  | 16.31  | 32.86  | 137.51 | 6.59  | 16.10  | 10.65  |
| Hengyang     | 53.54  | 94.00  | 317.97  | 34.48  | 57.41  | 82.80  | 21.90 | 48.71  | 19.06  |
| Jinzhou      | 67.10  | 93.40  | 360.74  | 51.08  | 67.85  | 88.20  | 37.15 | 56.95  | 30.51  |
| Yinchuan     | 110.39 | 91.43  | 439.82  | 52.59  | 49.38  | 75.60  | 40.16 | 35.59  | 15.81  |
| Jiangmen     | 113.84 | 90.05  | 768.36  | 53.87  | 34.18  | 260.68 | 25.50 | 23.06  | 18.31  |
| Xining       | 80.07  | 89.98  | 354.94  | 45.77  | 62.49  | 62.62  | 36.44 | 55.18  | 14.49  |
| Pingdingshan | 60.12  | 86.01  | 407.87  | 39.55  | 64.95  | 97.84  | 27.42 | 41.08  | 22.73  |
| Kaifeng      | 65.73  | 85.38  | 189.49  | 48.07  | 57.80  | 61.13  | 38.37 | 50.78  | 16.01  |
| Haikou       | 76.42  | 85.34  | 489.55  | 42.06  | 48.40  | 133.62 | 23.42 | 28.02  | 18.45  |
| Benxi        | 42.69  | 85.11  | 508.11  | 35.63  | 83.40  | 121.33 | 30.48 | 76.88  | 32.51  |
| Yingkou      | 88.40  | 85.03  | 450.64  | 42.40  | 50.90  | 64.53  | 32.65 | 42.16  | 18.38  |
| Qinhuangdao  | 107.00 | 82.62  | 466.86  | 52.73  | 51.11  | 158.70 | 34.92 | 36.49  | 25.89  |
| Zhangjiakou  | 46.29  | 82.30  | 309.72  | 36.49  | 63.31  | 116.68 | 25.08 | 52.91  | 23.86  |
| Huaibei      | 60.62  | 81.10  | 281.86  | 35.44  | 51.50  | 68.58  | 13.99 | 36.65  | 15.70  |
| Zaozhuang    | 41.25  | 80.06  | 653.77  | 14.86  | 65.42  | 138.30 | 5.12  | 38.08  | 32.81  |
| Nantong      | 153.09 | 80.00  | 1144.90 | 51.02  | 76.95  | 159.87 | 26.40 | 34.33  | 28.48  |
| Zhuzhou      | 83.45  | 79.66  | 521.04  | 56.51  | 55.35  | 154.63 | 36.27 | 41.49  | 25.56  |
| Zhenjiang    | 68.12  | 79.27  | 741.26  | 34.29  | 51.87  | 144.75 | 20.96 | 36.83  | 20.97  |
| Bengbu       | 65.29  | 78.21  | 267.09  | 29.93  | 53.14  | 74.66  | 25.39 | 44.92  | 21.33  |
| Fuxin        | 60.40  | 77.80  | 160.63  | 44.59  | 68.79  | 48.38  | 33.47 | 63.55  | 14.92  |
| Chifeng      | 60.32  | 76.61  | 377.93  | 28.90  | 36.60  | 70.89  | 19.84 | 35.01  | 17.26  |
| Zigong       | 34.25  | 76.39  | 352.08  | 23.49  | 47.30  | 90.85  | 16.61 | 39.32  | 18.33  |
| Xianyang     | 50.88  | 76.29  | 322.02  | 30.27  | 45.37  | 116.88 | 19.69 | 35.21  | 18.87  |
| Xiangfan     | 83.23  | 75.81  | 712.32  | 40.93  | 62.41  | 89.40  | 24.02 | 41.04  | 15.46  |
| Guilin       | 61.31  | 75.79  | 303.58  | 38.29  | 48.81  | 99.84  | 27.03 | 36.41  | 15.63  |
| Jiaozuo      | 95.26  | 75.35  | 221.55  | 63.57  | 55.78  | 65.19  | 35.65 | 40.91  | 18.04  |
| Yichun       | 22.27  | 75.16  | 115.14  | 14.79  | 78.03  | 48.67  | 11.34 | 79.58  | 15.14  |

|             |        |       |         |       |       |        |       |       |       |
|-------------|--------|-------|---------|-------|-------|--------|-------|-------|-------|
| Mianyang    | 45.43  | 74.82 | 387.46  | 30.61 | 43.05 | 139.22 | 11.31 | 26.29 | 6.19  |
| Xinxiang    | 74.57  | 74.00 | 269.41  | 51.54 | 61.40 | 78.99  | 40.30 | 47.38 | 17.33 |
| Yangzhou    | 114.53 | 73.75 | 830.87  | 53.09 | 42.42 | 137.25 | 25.52 | 31.29 | 20.64 |
| Jixi        | 23.36  | 73.72 | 139.51  | 21.30 | 76.01 | 44.20  | 19.13 | 68.39 | 15.04 |
| Liaoyang    | 87.89  | 72.70 | 332.77  | 71.04 | 58.28 | 86.83  | 44.73 | 49.25 | 25.92 |
| Yichang     | 49.62  | 72.25 | 649.93  | 38.27 | 50.77 | 92.65  | 22.75 | 37.16 | 18.16 |
| Changzhi    | 53.73  | 72.12 | 220.67  | 33.96 | 40.31 | 81.27  | 28.79 | 32.11 | 17.64 |
| Zhuhai      | 63.51  | 72.08 | 1038.66 | 35.13 | 40.11 | 283.77 | 13.70 | 16.47 | 31.67 |
| Nanchong    | 27.69  | 72.00 | 246.67  | 16.28 | 42.96 | 68.07  | 9.62  | 18.03 | 7.74  |
| Zunyi       | 33.40  | 72.00 | 239.23  | 19.78 | 36.82 | 68.51  | 15.11 | 26.19 | 12.57 |
| Baoji       | 56.50  | 71.67 | 467.84  | 36.02 | 47.90 | 100.42 | 24.00 | 33.78 | 18.53 |
| Huangshi    | 74.16  | 71.54 | 303.84  | 41.80 | 57.57 | 103.95 | 29.36 | 45.76 | 19.13 |
| Xiangtan    | 56.96  | 71.39 | 430.16  | 39.36 | 54.14 | 118.08 | 31.17 | 43.06 | 18.92 |
| Jieyang     | 132.55 | 70.68 | 185.98  | 61.36 | 22.70 | 70.51  | 11.00 | 0.00  | 0.00  |
| Lianyungang | 59.02  | 70.50 | 369.54  | 33.17 | 47.04 | 103.31 | 21.00 | 35.41 | 18.70 |
| Fuyang      | 58.04  | 70.05 | 188.91  | 28.32 | 32.24 | 65.70  | 15.81 | 17.96 | 6.48  |
| Anyang      | 90.51  | 69.55 | 311.86  | 59.10 | 54.73 | 99.91  | 43.70 | 42.03 | 20.39 |
| Mudanjiang  | 63.03  | 68.80 | 201.30  | 54.44 | 65.74 | 86.31  | 41.81 | 57.17 | 22.90 |
| Panjin      | 88.38  | 68.77 | 431.50  | 56.37 | 48.36 | 254.54 | 34.93 | 36.28 | 30.13 |
| Heze        | 69.46  | 68.34 | 205.60  | 31.96 | 28.80 | 39.31  | 23.57 | 18.93 | 11.02 |
| Jingzhou    | 61.36  | 67.71 | 249.06  | 43.61 | 61.56 | 80.91  | 34.52 | 28.27 | 14.64 |
| Yancheng    | 70.47  | 66.30 | 528.55  | 36.05 | 32.34 | 69.63  | 18.54 | 29.68 | 26.37 |
| Quanzhou    | 71.49  | 66.30 | 703.57  | 53.96 | 30.50 | 162.82 | 11.13 | 18.52 | 11.50 |
| Zhanjiang   | 70.97  | 65.22 | 623.94  | 42.18 | 62.18 | 204.22 | 25.20 | 40.10 | 32.25 |
| Dandong     | 43.28  | 64.74 | 217.43  | 35.74 | 60.26 | 82.94  | 27.24 | 52.37 | 21.85 |
| Tianshui    | 18.78  | 63.34 | 153.35  | 17.02 | 32.20 | 42.39  | 13.88 | 24.50 | 12.71 |
| Jining      | 67.79  | 63.13 | 538.98  | 39.78 | 36.90 | 90.12  | 23.20 | 26.52 | 9.96  |
| Changde     | 38.21  | 62.12 | 559.90  | 26.19 | 34.10 | 124.77 | 16.10 | 30.13 | 16.79 |
| Luzhou      | 20.75  | 61.95 | 301.76  | 13.44 | 38.61 | 81.99  | 5.90  | 26.29 | 9.94  |
| Yueyang     | 51.44  | 61.80 | 550.46  | 27.86 | 45.95 | 159.85 | 12.41 | 30.28 | 21.34 |
| Binzhou     | 72.36  | 61.80 | 286.09  | 30.89 | 19.84 | 60.61  | 18.49 | 13.36 | 7.32  |
| Xingtai     | 81.84  | 61.20 | 186.66  | 60.62 | 42.29 | 52.13  | 34.29 | 30.28 | 15.33 |
| Jiujiang    | 41.80  | 60.73 | 390.32  | 20.19 | 37.23 | 91.76  | 12.69 | 29.12 | 10.04 |
| Jiamusi     | 58.67  | 60.60 | 209.77  | 44.07 | 58.94 | 66.67  | 39.27 | 49.34 | 19.47 |
| Taizhou     | 92.52  | 60.40 | 458.53  | 36.95 | 29.11 | 112.56 | 20.85 | 15.24 | 8.45  |
| Dezhou      | 92.99  | 59.74 | 306.95  | 54.20 | 31.85 | 87.81  | 29.55 | 19.55 | 10.93 |
| Dongying    | 219.76 | 59.70 | 1377.03 | 81.90 | 50.44 | 379.33 | 63.87 | 28.17 | 54.99 |
| Huzhou      | 66.54  | 59.39 | 506.11  | 19.64 | 31.47 | 177.43 | 8.73  | 21.81 | 26.91 |
| Siping      | 44.49  | 59.00 | 173.75  | 35.10 | 39.20 | 40.33  | 28.46 | 31.72 | 3.31  |
| Zhongshan   | 127.63 | 57.96 | 1566.41 | 57.37 | 21.86 | 312.82 | 14.10 | 27.88 | 43.55 |
| Taian       | 103.94 | 57.84 | 587.35  | 52.43 | 46.00 | 159.80 | 24.22 | 35.07 | 19.32 |
| Panzhuhua   | 10.44  | 57.16 | 329.48  | 8.24  | 50.10 | 93.34  | 4.91  | 41.55 | 18.39 |
| Anqing      | 42.99  | 57.10 | 192.35  | 20.76 | 36.86 | 71.31  | 13.74 | 25.07 | 13.10 |
| Liaocheng   | 70.18  | 56.60 | 210.31  | 30.03 | 22.80 | 52.28  | 18.07 | 20.78 | 12.02 |
| Yiwu        | 107.14 | 56.50 | 227.96  | 23.55 | 8.45  | 119.27 | 5.56  | 5.90  | 11.26 |
| Hegang      | 60.16  | 56.26 | 134.07  | 42.80 | 59.18 | 33.77  | 37.48 | 52.27 | 14.34 |
| Shaoguan    | 39.03  | 56.01 | 293.23  | 26.13 | 37.54 | 81.45  | 20.04 | 35.00 | 22.20 |

---

|          |        |       |        |       |       |        |       |       |       |
|----------|--------|-------|--------|-------|-------|--------|-------|-------|-------|
| Qujing   | 41.49  | 55.60 | 271.52 | 20.61 | 21.76 | 75.13  | 11.80 | 17.87 | 18.82 |
| Yangquan | 38.75  | 55.33 | 235.50 | 31.34 | 46.13 | 70.78  | 26.52 | 36.23 | 15.28 |
| Rizhao   | 102.19 | 54.82 | 670.43 | 37.15 | 26.10 | 112.99 | 13.61 | 18.50 | 15.65 |
| Shaoyang | 32.68  | 53.95 | 123.47 | 22.71 | 31.30 | 37.35  | 17.86 | 24.72 | 9.12  |
| Ordos    | 16.90  | 53.90 | 507.40 | 4.01  | 12.80 | 35.80  | 2.63  | 7.82  | 2.83  |
| Cangzhou | 59.70  | 53.28 | 327.48 | 47.55 | 36.15 | 60.19  | 33.54 | 24.27 | 9.55  |
| Yiyang   | 29.13  | 53.00 | 231.31 | 15.77 | 37.70 | 66.80  | 10.69 | 18.58 | 7.59  |
| Shaoxing | 116.11 | 52.38 | 407.58 | 32.45 | 23.55 | 119.16 | 11.19 | 17.98 | 13.74 |
| Maanshan | 91.67  | 51.82 | 520.69 | 45.15 | 41.14 | 99.32  | 22.15 | 30.54 | 20.23 |
| Chaoyang | 43.28  | 51.50 | 135.94 | 27.15 | 30.71 | 31.99  | 19.83 | 22.24 | 9.02  |
| Ganzhou  | 44.83  | 51.11 | 183.46 | 16.11 | 47.17 | 46.30  | 8.97  | 22.01 | 6.83  |

---
